# Supplementary material for: Syntheses, structures and properties of three-dimensional lanthanide frameworks constructed with a trigonal anti-prismatic lanthanide cluster
Source: Royal Society of Chemistry journal article supplement (doi:10.1039/c0ce00848f), 2011-01-01
Supplement: c0ce00848f.pdf [file c0ce00848f.pdf]

## Supporting Information

# Syntheses, structures and properties of three-dimensional lanthanide frameworks constructed with trigonal anti-prismatic lanthanide cluster

Ning Yuan,<sup>a,b</sup> Tianlu Sheng,<sup>a</sup> Chongbin Tian,<sup>a</sup> Shengmin Hu,<sup>a</sup> Ruibiao Fu,<sup>a</sup> Qilong Zhu,<sup>a,b</sup> Chunhong Tan,<sup>a,b</sup> and Xintao Wu\*<sup>a</sup>

<sup>a</sup> *State Key Laboratory of Structural Chemistry, Fujian Institute of Research on the Structure of Matter, Chinese Academy of Sciences, Fuzhou, 350002, PR China.*

<sup>b</sup> *Graduate University of Chinese Academy of Sciences, Beijing, 100049, PR China.*

*E-mail: wxt@fjirsm.ac.cn.*

Table S1 Selected Bond Distances (Å) and Bond Angles (deg) for **1**.

| bond                  |            |                      |            |
|-----------------------|------------|----------------------|------------|
| Gd(1)-O(1)            | 2.401(4)   | Gd(2)-O(6)#5         | 2.479(5)   |
| Gd(1)-O(1)#1          | 2.529(4)   | Gd(2)-O(3)           | 2.512(5)   |
| Gd(1)-O(3)            | 2.311(5)   | Gd(2)-O(3)#5         | 2.512(5)   |
| Gd(1)-O(4)            | 2.425(4)   | Gd(2)-N(2)           | 2.566(7)   |
| Gd(1)-O(4)#2          | 2.480(4)   | Gd(2)-N(2)#5         | 2.567(7)   |
| Gd(1)-O(6)            | 2.311(4)   | Gd(2)-N(1)           | 2.666(6)   |
| Gd(1)-O(7)            | 2.319(2)   | O(1)-Gd(1)#6         | 2.529(4)   |
| Gd(1)-Gd(1)#2         | 3.8402(5)  | O(4)-Gd(1)#3         | 2.480(4)   |
| Gd(1)-Gd(2)           | 4.0005(3)  | O(7)-Gd(1)#2         | 2.319(2)   |
| Gd(2)-O(6)            | 2.479(5)   |                      |            |
| angle                 |            |                      |            |
| Gd(1)#2-Gd(1)-Gd(1)#3 | 60         | N(2)#5-Gd(2)-N(1)#5  | 136.3(2)   |
| O(1)-Gd(1)-O(1)#1     | 73.99(7)   | N(2)-Gd(2)-N(2)#5    | 71.0(4)    |
| O(1)-Gd(1)-O(4)       | 150.30(16) | O(3)-Gd(2)-O(3)#5    | 173.3(2)   |
| O(1)-Gd(1)-O(4)#2     | 88.22(17)  | O(6)-Gd(2)-O(3)      | 63.15(15)  |
| O(3)-Gd(1)-O(6)       | 68.88(16)  | O(6)-Gd(2)-O(3)#5    | 114.52(15) |
| O(4)-Gd(1)-O(1)#1     | 82.93(16)  | O(6)#5-Gd(2)-O(3)    | 114.52(15) |
| O(4)-Gd(1)-O(4)#2     | 103.9(2)   | O(6)#5-Gd(2)-O(3)#5  | 63.15(15)  |
| O(4)#2-Gd(1)-O(1)#1   | 150.23(15) | O(6)-Gd(2)-O(6)#5    | 143.5(2)   |
| O(7)-Gd(1)-O(1)       | 86.04(17)  | Gd(1)-O(1)-Gd(1)#6   | 129.45(19) |
| O(7)-Gd(1)-O(1)#1     | 83.21(16)  | Gd(1)-O(3)-Gd(2)     | 112.02(18) |
| O(7)-Gd(1)-O(4)       | 72.70(14)  | Gd(1)-O(4)-Gd(1)#3   | 103.05(16) |
| O(7)-Gd(1)-O(4)#2     | 71.70(14)  | Gd(1)-O(6)-Gd(2)     | 113.25(18) |
| N(1)-Gd(2)-N(1)#5     | 152.3(3)   | Gd(1)#2-O(7)-Gd(1)   | 111.76(15) |
| N(2)-Gd(2)-N(1)       | 136.3(2)   | Gd(1)-O(7)-Gd(1)#3   | 111.76(15) |
| N(2)-Gd(2)-N(1)#5     | 70.5(2)    | Gd(1)#2-O(7)-Gd(1)#3 | 111.76(15) |
| N(2)#5-Gd(2)-N(1)     | 70.5(2)    |                      |            |

Symmetry transformations used to generate equivalent atoms: #1: x-y+1,x,-z, #2: -x+y+1,-x+2,z,  
 #3: -y+2,x-y+1,z, #4: x-y+1/3,-y+5/3,-z+1/6, #5: -x+4/3,-x+y+2/3,-z+1/6, #6: y,-x+y+1,-z

Table S2 Selected Bond Distances (Å) and Bond Angles (deg) for **2**.

| bond                  |            |                      |            |
|-----------------------|------------|----------------------|------------|
| Eu(1)-O(1)            | 2.405(5)   | Eu(2)-O(6)#5         | 2.483(5)   |
| Eu(1)-O(1)#1          | 2.555(5)   | Eu(2)-O(3)           | 2.513(5)   |
| Eu(1)-O(3)            | 2.321(5)   | Eu(2)-O(3)#5         | 2.514(5)   |
| Eu(1)-O(4)            | 2.433(5)   | Eu(2)-N(2)           | 2.590(7)   |
| Eu(1)-O(4)#2          | 2.497(5)   | Eu(2)-N(2)#5         | 2.590(7)   |
| Eu(1)-O(6)            | 2.323(5)   | Eu(2)-N(1)           | 2.670(6)   |
| Eu(1)-O(7)            | 2.330(2)   | O(1)-Eu(1)#6         | 2.555(5)   |
| Eu(1)-Eu(1)#2         | 3.8615(5)  | O(4)-Eu(1)#3         | 2.497(5)   |
| Eu(1)-Eu(2)           | 4.0127(3)  | O(7)-Eu(1)#2         | 2.330(2)   |
| Eu(2)-O(6)            | 2.482(5)   |                      |            |
| angle                 |            |                      |            |
| Eu(1)#2-Eu(1)-Eu(1)#3 | 60         | N(2)#5-Eu(2)-N(1)#5  | 136.1(2)   |
| O(1)-Eu(1)-O(1)#1     | 74.12(7)   | N(2)#5-Eu(2)-N(2)    | 71.0(4)    |
| O(1)-Eu(1)-O(4)       | 150.75(16) | O(3)#5-Eu(2)-O(3)    | 173.7(2)   |
| O(1)-Eu(1)-O(4)#2     | 88.60(17)  | O(6)-Eu(2)-O(3)      | 63.32(16)  |
| O(3)-Eu(1)-O(6)       | 68.76(18)  | O(6)-Eu(2)-O(3)#5    | 114.47(16) |
| O(4)-Eu(1)-O(1)#1     | 83.17(17)  | O(6)#5-Eu(2)-O(3)    | 114.47(16) |
| O(4)-Eu(1)-O(4)#2     | 103.2(2)   | O(6)#5-Eu(2)-O(3)#5  | 63.31(16)  |
| O(4)#2-Eu(1)-O(1)#1   | 150.33(16) | O(6)#5-Eu(2)-O(6)    | 143.1(2)   |
| O(7)-Eu(1)-O(1)       | 86.43(18)  | Eu(1)-O(1)-Eu(1)#6   | 129.13(19) |
| O(7)-Eu(1)-O(1)#1     | 83.34(18)  | Eu(1)-O(3)-Eu(2)     | 112.1(2)   |
| O(7)-Eu(1)-O(4)       | 72.63(15)  | Eu(1)-O(4)-Eu(1)#3   | 103.13(17) |
| O(7)-Eu(1)-O(4)#2     | 71.46(15)  | Eu(1)-O(6)-Eu(2)     | 113.13(19) |
| N(1)#5-Eu(2)-N(1)     | 152.7(3)   | Eu(1)-O(7)-Eu(1)#2   | 111.89(16) |
| N(2)-Eu(2)-N(1)       | 136.1(2)   | Eu(1)#3-O(7)-Eu(1)   | 111.89(16) |
| N(2)-Eu(2)-N(1)#5     | 70.3(2)    | Eu(1)#3-O(7)-Eu(1)#2 | 111.89(16) |
| N(2)#5-Eu(2)-N(1)     | 70.3(2)    |                      |            |

Symmetry transformations used to generate equivalent atoms: #1:  $y-1/3, -x+y+1/3, -z+1/3$ , #2:  $-y+1, x-y+1, z$ , #3:  $-x+y, -x+1, z$ , #4:  $-x+1/3, -x+y-1/3, -z+1/6$ , #5:  $x-y+1/3, -y+2/3, -z+1/6$ , #6:  $x-y+2/3, x+1/3, -z+1/3$ .

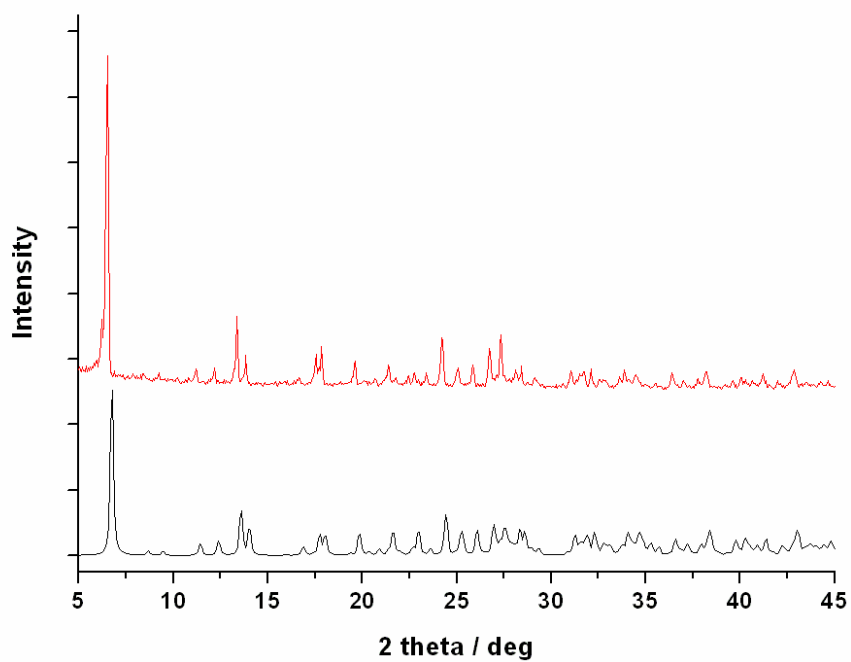

(a)

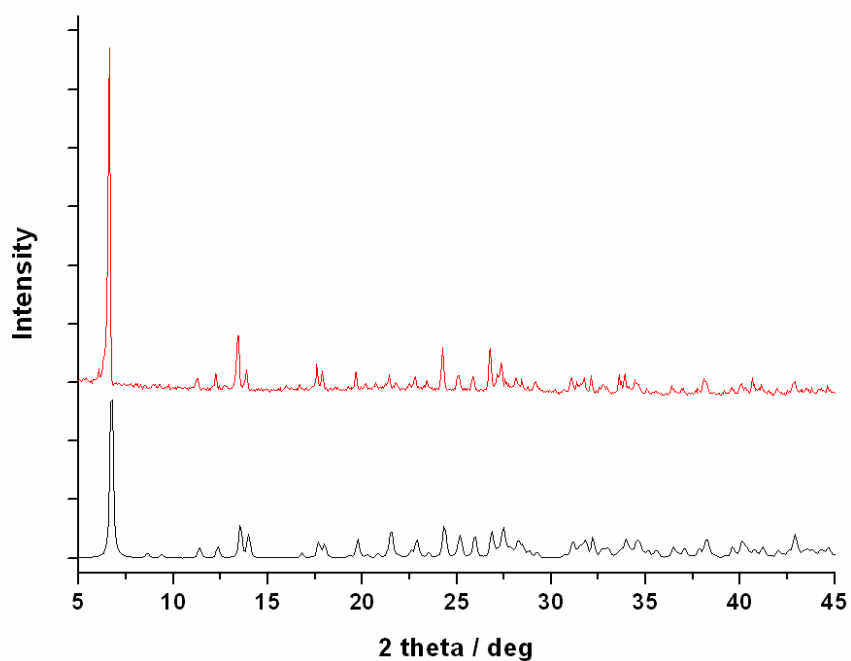

(b)

Fig. S1 X-ray powder diffraction of complexes **1•Gd** (a) and **2•Eu** (b). Black: simulated from single crystal data; Red: observed for complexes.

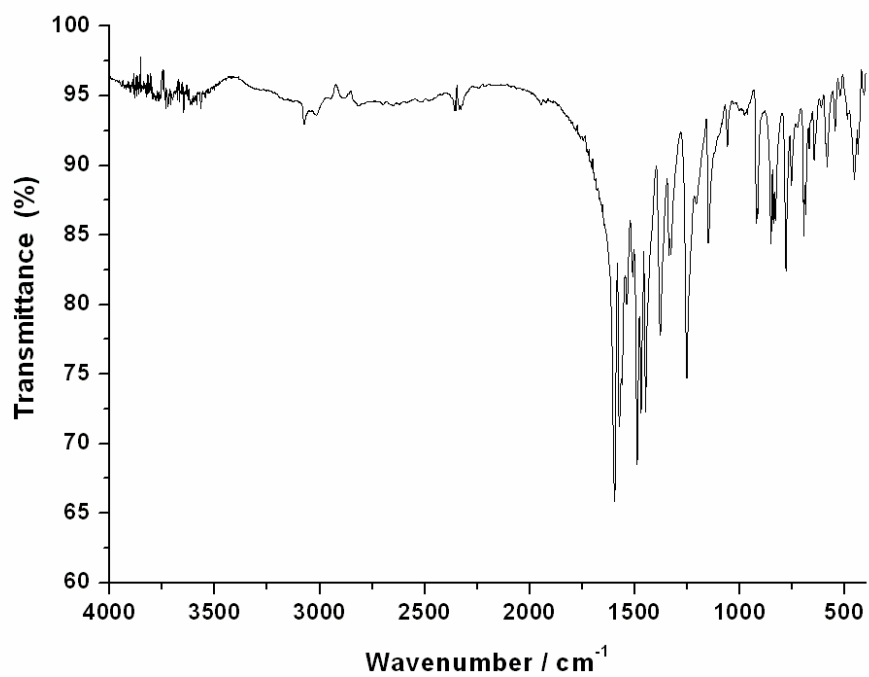

(a)

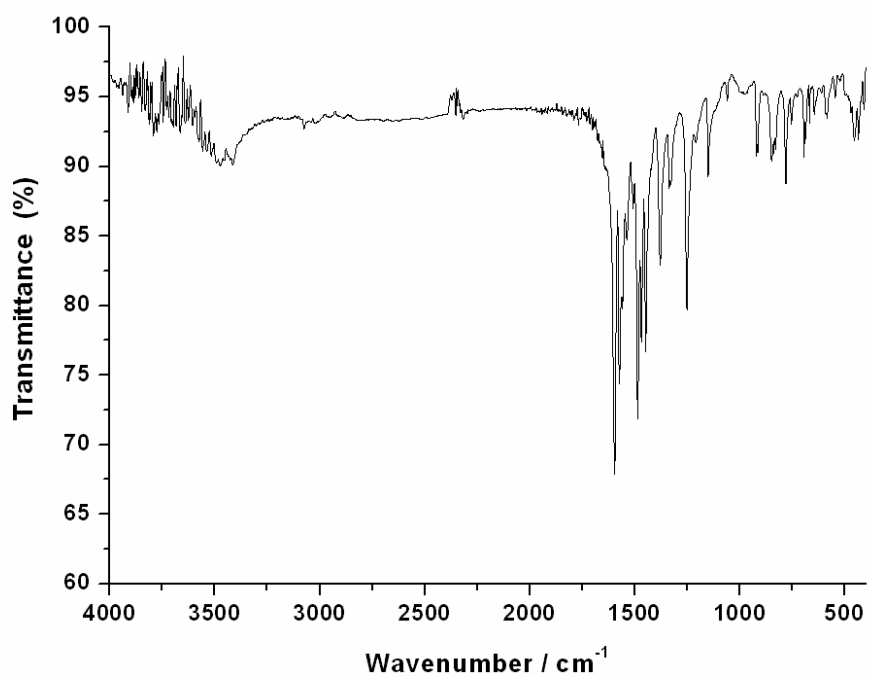

(b)

Fig. S2 FT-IR spectra for complexes **1•Gd** (a) and **2•Eu** (b).

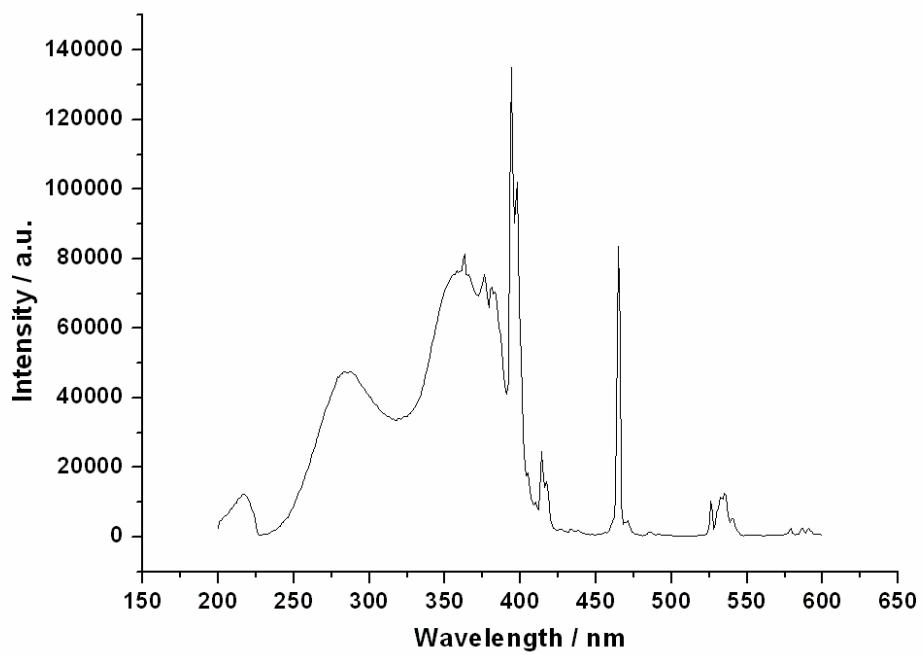

Fig. S3 Solid state excitation spectra of **2•Eu**.
